# Supplementary material for: Isolation and characterization of auronlignan derivatives with hepatoprotective and hypolipidemic activities from the fruits of Hippophae rhamnoides L.
Source: Royal Society of Chemistry journal article supplement (doi:10.1039/d2fo01079h), 2022-01-01
Supplement: d2fo01079h1.pdf [file d2fo01079h1.pdf]

## Supplementary information

### Isolation and Characterization of Auronlignan Derivatives with Hepatoprotective and Hypolipidemic Activities from the Fruits of *Hippophae rhamnoides* L.<sup>1</sup>

Qinge Ma,<sup>a</sup> Yang Guan,<sup>a</sup> Jianghong Dong,<sup>d</sup> Zhipei Sang,<sup>b,c,\*</sup> Rongrui Wei<sup>a,\*</sup>

<sup>a</sup>*Key Laboratory of Modern Preparation of Traditional Chinese Medicine of Ministry of Education, Research Center of Natural Resources of Chinese Medicinal Materials and Ethnic Medicine, Science and Technology College, Jiangxi University of Traditional Chinese Medicine, Nanchang 330004 China*

<sup>b</sup>*College of Chemistry and Pharmaceutical Engineering, Nanyang Normal University, Nanyang 473061, China*

<sup>c</sup>*School of Pharmaceutical Sciences, Hainan University, Haikou 570228, China*

<sup>d</sup>*College of Chemistry and Pharmaceutical Engineering, Huanghuai University, Zhumadian 463000, China*

---

<sup>1</sup>\*Corresponding authors.

*E-mail:* weirongrui2011@163.com (R.-R Wei); sangzhipei@126.com (Z.-P Sang).

## Contents

|                                                                                                                            |       |
|----------------------------------------------------------------------------------------------------------------------------|-------|
| 1. Table S1 $^1\text{H}$ NMR (400 MHz, Acetone- $d_6$ ) and $^{13}\text{C}$ NMR (100 MHz, Acetone- $d_6$ )<br>of compounds | (1-3) |
| 2. Table S2 $^1\text{H}$ NMR (400 MHz, Acetone- $d_6$ ) and $^{13}\text{C}$ NMR (100 MHz, Acetone- $d_6$ )<br>of compounds | (4-6) |
| 3. Table S3 $^1\text{H}$ NMR (400 MHz, Acetone- $d_6$ ) and $^{13}\text{C}$ NMR (100 MHz, Acetone- $d_6$ )<br>of compounds | (7-9) |
| 4. Data information of compounds (1-9)                                                                                     | 6     |

Table S1 <sup>1</sup>H NMR (400 MHz, Acetone-*d*<sub>6</sub>) and <sup>13</sup>C NMR (100 MHz, Acetone-*d*<sub>6</sub>) of compounds (**1-3**).

| No.                    | <b>1</b>            |                     | <b>2</b>            |                     | <b>3</b>            |                     |
|------------------------|---------------------|---------------------|---------------------|---------------------|---------------------|---------------------|
|                        | $\delta_{\text{H}}$ | $\delta_{\text{C}}$ | $\delta_{\text{H}}$ | $\delta_{\text{C}}$ | $\delta_{\text{H}}$ | $\delta_{\text{C}}$ |
| 1                      | -                   | -                   | -                   | -                   | -                   | -                   |
| 2                      | -                   | 143.6               | -                   | 143.7               | -                   | 143.6               |
| 3                      | -                   | 182.1               | -                   | 182.1               | -                   | 182.1               |
| 4                      | 7.83(dd,2.0,8.0)    | 127.8               | 7.84(dd,2.0,8.0)    | 127.9               | 7.83(dd,2.0,8.0)    | 127.8               |
| 5                      | 6.41(d,8.0)         | 114.7               | 6.41(d,8.0)         | 114.7               | 6.41(d,8.0)         | 114.7               |
| 6                      | -                   | 164.7               | -                   | 164.7               | -                   | 164.7               |
| 7                      | 6.44(d,2.0)         | 101.9               | 6.45(d,2.0)         | 101.8               | 6.44(d,2.0)         | 101.9               |
| 8                      | -                   | 168.2               | -                   | 168.4               | -                   | 168.2               |
| 9                      | -                   | 116.2               | -                   | 116.3               | -                   | 116.2               |
| 10                     | -                   | 128.3               | -                   | 128.3               | -                   | 128.3               |
| 1'                     | -                   | 130.8               | -                   | 129.7               | -                   | 130.9               |
| 2'                     | 6.91(s)             | 107.1               | 6.11(s)             | 111.4               | 6.12(s)             | 111.8               |
| 3'                     | -                   | 151.2               | -                   | 150.7               | -                   | 151.1               |
| 4'                     | -                   | 142.4               | -                   | 134.1               | -                   | 132.4               |
| 5'                     | -                   | 127.0               | -                   | 147.0               | -                   | 151.1               |
| 6'                     | 7.30(s)             | 112.4               | 6.23(s)             | 106.5               | 6.12(s)             | 111.8               |
| 1''                    | -                   | -                   | -                   | -                   | -                   | -                   |
| 2''                    | -                   | 143.6               | -                   | 143.7               | -                   | 143.6               |
| 3''                    | -                   | 182.1               | -                   | 182.1               | -                   | 182.1               |
| 4''                    | 7.83(dd,2.0,8.0)    | 127.8               | 7.84(dd,2.0,8.0)    | 127.9               | 7.83(dd,2.0,8.0)    | 127.8               |
| 5''                    | 6.41(d,8.0)         | 114.7               | 6.41(d,8.0)         | 114.7               | 6.41(d,8.0)         | 114.7               |
| 6''                    | -                   | 164.7               | -                   | 164.7               | -                   | 164.7               |
| 7''                    | 6.44(d,2.0)         | 101.9               | 6.45(d,2.0)         | 101.8               | 6.44(d,2.0)         | 101.9               |
| 8''                    | -                   | 168.2               | -                   | 168.4               | -                   | 168.2               |
| 9''                    | -                   | 116.2               | -                   | 116.3               | -                   | 116.2               |
| 10''                   | -                   | 128.1               | -                   | 128.1               | -                   | 128.1               |
| 1'''                   | -                   | 126.2               | -                   | 126.3               | -                   | 126.2               |
| 2'''                   | 7.31(d,8.0)         | 128.5               | 7.33(d,8.0)         | 129.4               | 7.32(d,8.0)         | 128.8               |
| 3'''                   | 6.62(d,8.0)         | 116.6               | 6.63(d,8.0)         | 116.7               | 6.62(d,8.0)         | 116.7               |
| 4'''                   | -                   | 156.4               | -                   | 157.0               | -                   | 156.4               |
| 5'''                   | 6.62(d,8.0)         | 116.6               | 6.63(d,8.0)         | 116.7               | 6.62(d,8.0)         | 116.7               |
| 6'''                   | 7.31(d,8.0)         | 128.5               | 7.33(d,8.0)         | 129.4               | 7.32(d,8.0)         | 128.8               |
| 1''''                  | -                   | 125.2               | -                   | 124.5               | -                   | 134.2               |
| 2''''                  | 7.45(d,8.0)         | 126.4               | 7.13(dd,2.0,8.0)    | 121.4               | 6.37(s)             | 105.0               |
| 3''''                  | 6.83(d,8.0)         | 117.2               | 6.92(d,8.0)         | 117.6               | -                   | 148.8               |
| 4''''                  | -                   | 157.8               | -                   | 148.0               | -                   | 137.1               |
| 5''''                  | 6.83(d,8.0)         | 117.2               | -                   | 150.6               | -                   | 148.8               |
| 6''''                  | 7.45(d,8.0)         | 126.4               | 6.65(d,2.0)         | 112.1               | 6.37(s)             | 105.0               |
| 7''''                  | -                   | 152.0               | -                   | 126.2               | 7.01(s)             | 129.2               |
| 8''''                  | -                   | 114.1               | -                   | 124.8               | -                   | 122.2               |
| 9''''                  | 4.63(s)             | 51.2                | 4.21(s)             | 48.6                | 4.22(s)             | 57.2                |
| 3''''-OCH <sub>3</sub> | -                   | -                   | -                   | -                   | 3.84(s)             | 56.2                |
| 5''''-OCH <sub>3</sub> | -                   | -                   | 3.85(s)             | 56.4                | 3.84(s)             | 56.2                |

Table S2 <sup>1</sup>H NMR (400 MHz, Acetone-*d*<sub>6</sub>) and <sup>13</sup>C NMR (100 MHz, Acetone-*d*<sub>6</sub>) of compounds (4-6).

| No.                   | 4                   |                     | 5                   |                     | 6                   |                     |
|-----------------------|---------------------|---------------------|---------------------|---------------------|---------------------|---------------------|
|                       | $\delta_{\text{H}}$ | $\delta_{\text{C}}$ | $\delta_{\text{H}}$ | $\delta_{\text{C}}$ | $\delta_{\text{H}}$ | $\delta_{\text{C}}$ |
| 1                     | -                   | -                   | -                   | -                   | -                   | -                   |
| 2                     | -                   | 143.3               | -                   | 143.2               | -                   | 143.1               |
| 3                     | -                   | 182.3               | -                   | 182.3               | -                   | 182.3               |
| 4                     | 7.83(d,8.0)         | 125.0               | 8.28(d,8.0)         | 130.3               | 7.89(d,8.0)         | 126.4               |
| 5                     | 7.02(d,8.0)         | 110.2               | 6.82(d,8.0)         | 112.9               | 7.04(d,8.0)         | 111.3               |
| 6                     | -                   | 164.8               | -                   | 162.9               | -                   | 163.5               |
| 7                     | -                   | 113.1               | -                   | 113.4               | -                   | 111.9               |
| 8                     | -                   | 157.9               | -                   | 158.5               | -                   | 159.1               |
| 9                     | -                   | 115.0               | -                   | 114.9               | -                   | 115.2               |
| 10                    | -                   | 124.1               | -                   | 124.1               | -                   | 124.1               |
| 11                    | 3.49(d,7.0)         | 22.5                | -                   | 197.2               | 3.65(s)             | 40.3                |
| 12                    | 5.42(t,7.0,1.5)     | 122.6               | 2.72(s)             | 49.2                | -                   | 210.8               |
| 13                    | -                   | 132.9               | -                   | 88.6                | 2.72(m)             | 40.5                |
| 1'                    | -                   | 131.3               | -                   | 134.8               | -                   | 136.1               |
| 2'                    | 6.95(s)             | 107.4               | 6.09(s)             | 109.0               | 6.10(s)             | 106.2               |
| 3'                    | -                   | 151.0               | -                   | 150.9               | -                   | 150.6               |
| 4'                    | -                   | 142.2               | -                   | 133.7               | -                   | 131.7               |
| 5'                    | -                   | 127.3               | -                   | 146.8               | -                   | 150.6               |
| 6'                    | 7.36(s)             | 111.9               | 6.13(s)             | 107.6               | 6.10(s)             | 106.2               |
| 1''                   | -                   | 128.2               | -                   | 128.2               | -                   | -                   |
| 2''                   | 6.95(d,8.0)         | 130.8               | 6.96(d,8.0)         | 130.9               | 6.95(d,8.0)         | 130.8               |
| 3''                   | 6.63(d,8.0)         | 116.3               | 6.62(d,8.0)         | 116.5               | 6.62(d,8.0)         | 116.5               |
| 4''                   | -                   | 156.1               | -                   | 156.2               | -                   | 156.1               |
| 5''                   | 6.63(d,8.0)         | 116.3               | 6.62(d,8.0)         | 116.5               | 6.62(d,8.0)         | 116.5               |
| 6''                   | 6.95(d,8.0)         | 130.8               | 6.96(d,8.0)         | 130.9               | 6.95(d,8.0)         | 130.8               |
| 7''                   | 3.24(s)             | 42.3                | 3.24(s)             | 42.3                | 3.24(s)             | 42.3                |
| 1'''                  | -                   | 125.2               | -                   | 124.5               | -                   | 134.2               |
| 2'''                  | 7.45(d,8.0)         | 126.4               | 7.13(dd,2.0,8.0)    | 121.4               | 6.37(s)             | 105.0               |
| 3'''                  | 6.83(d,8.0)         | 117.2               | 6.92(d,8.0)         | 117.6               | -                   | 148.8               |
| 4'''                  | -                   | 157.8               | -                   | 148.0               | -                   | 137.1               |
| 5'''                  | 6.83(d,8.0)         | 117.2               | -                   | 150.6               | -                   | 148.8               |
| 6'''                  | 7.45(d,8.0)         | 126.4               | 6.65(d,2.0)         | 112.1               | 6.37(s)             | 105.0               |
| 7'''                  | -                   | 152.0               | -                   | 126.2               | 7.01(s)             | 129.2               |
| 8'''                  | -                   | 114.1               | -                   | 124.8               | -                   | 122.2               |
| 9'''                  | 4.63(s)             | 51.2                | 4.21(s)             | 48.6                | 4.22(s)             | 57.2                |
| 14-CH <sub>3</sub>    | 1.69(s)             | 25.9                | 1.41(s)             | 27.4                | 1.18(d,6.9)         | 17.8                |
| 15-CH <sub>3</sub>    | 1.88(s)             | 18.3                | 1.41(s)             | 27.4                | 1.18(d,6.9)         | 17.8                |
| 3'''-OCH <sub>3</sub> | -                   | -                   | -                   | -                   | 3.84(s)             | 56.2                |
| 5'''-OCH <sub>3</sub> | -                   | -                   | 3.85(s)             | 56.4                | 3.84(s)             | 56.2                |

Table S3 <sup>1</sup>H NMR (400 MHz, Acetone-*d*<sub>6</sub>) and <sup>13</sup>C NMR (100 MHz, Acetone-*d*<sub>6</sub>) of compounds (7-9).

| No.                   | 7                   |                     | 8                   |                     | 9                   |                     |
|-----------------------|---------------------|---------------------|---------------------|---------------------|---------------------|---------------------|
|                       | $\delta_{\text{H}}$ | $\delta_{\text{C}}$ | $\delta_{\text{H}}$ | $\delta_{\text{C}}$ | $\delta_{\text{H}}$ | $\delta_{\text{C}}$ |
| 1                     | -                   | -                   | -                   | -                   | -                   | -                   |
| 2                     | -                   | 143.1               | -                   | 143.2               | -                   | 143.1               |
| 3                     | -                   | 179.8               | -                   | 179.8               | -                   | 179.8               |
| 4                     | 7.84(d,8.0)         | 125.2               | 7.80(d,8.0)         | 126.8               | 7.76(d,8.0)         | 127.0               |
| 5                     | 7.03(d,8.0)         | 110.4               | 6.62(d,8.0)         | 113.6               | 6.55(d,8.0)         | 112.2               |
| 6                     | -                   | 164.7               | -                   | 158.9               | -                   | 162.6               |
| 7                     | -                   | 113.2               | -                   | 110.7               | -                   | 114.7               |
| 8                     | -                   | 158.2               | -                   | 157.4               | -                   | 157.1               |
| 9                     | -                   | 115.1               | -                   | 114.7               | -                   | 115.0               |
| 10                    | -                   | 142.9               | -                   | 142.8               | -                   | 142.7               |
| 11                    | 3.50(d,7.0)         | 22.7                | 6.67(d,10.0)        | 115.9               | 6.89(d,16.5)        | 121.6               |
| 12                    | 5.42(t,7.0,1.5)     | 122.6               | 5.75(d,10.0)        | 128.5               | 6.70(d,16.5)        | 116.9               |
| 13                    | -                   | 132.9               | -                   | 81.8                | -                   | 81.5                |
| 1'                    | -                   | 131.5               | -                   | 128.8               | -                   | 127.6               |
| 2'                    | 6.93(s)             | 107.6               | 6.11(s)             | 109.4               | 6.12(s)             | 107.0               |
| 3'                    | -                   | 151.1               | -                   | 149.9               | -                   | 149.9               |
| 4'                    | -                   | 142.4               | -                   | 133.9               | -                   | 131.9               |
| 5'                    | -                   | 127.4               | -                   | 146.5               | -                   | 149.9               |
| 6'                    | 7.34(s)             | 111.7               | 6.16(s)             | 107.5               | 6.12(s)             | 107.0               |
| 1''                   | 5.51(d,7.8)         | 101.8               | 5.50(d,7.8)         | 101.6               | 5.51(d,7.8)         | 101.7               |
| 2''                   | 3.76(m)             | 75.1                | 3.74(m)             | 75.0                | 3.75(m)             | 75.1                |
| 3''                   | 3.88(m)             | 78.6                | 3.86(m)             | 78.4                | 3.86(m)             | 78.5                |
| 4''                   | 3.41(m)             | 72.1                | 3.40(m)             | 72.0                | 3.41(m)             | 72.2                |
| 5''                   | 3.79(m)             | 74.6                | 3.79(m)             | 74.5                | 3.79(m)             | 74.4                |
| 6''a                  | 3.49(dd,11.2,6.4)   | 62.7                | 3.50(dd,11.2,6.4)   | 62.6                | 3.51(dd,11.2,6.4)   | 62.6                |
| 6''b                  | 3.90(dd,11.2,3.2)   | 62.7                | 3.92(dd,11.2,3.2)   | 62.6                | 3.93(dd,11.2,3.2)   | 62.6                |
| 1'''                  | -                   | 125.3               | -                   | 124.3               | -                   | 134.1               |
| 2'''                  | 7.46(d,8.0)         | 126.5               | 7.14(dd,2.0,8.0)    | 121.6               | 6.37(s)             | 105.2               |
| 3'''                  | 6.84(d,8.0)         | 117.1               | 6.93(d,8.0)         | 117.6               | -                   | 148.6               |
| 4'''                  | -                   | 157.9               | -                   | 148.2               | -                   | 137.0               |
| 5'''                  | 6.84(d,8.0)         | 117.1               | -                   | 150.8               | -                   | 148.6               |
| 6'''                  | 7.46(d,8.0)         | 126.5               | 6.65(d,2.0)         | 112.2               | 6.37(s)             | 105.2               |
| 7'''                  | -                   | 152.0               | -                   | 126.4               | 7.01(s)             | 130.0               |
| 8'''                  | -                   | 114.1               | -                   | 124.7               | -                   | 122.1               |
| 9'''                  | 4.63(s)             | 51.3                | 4.20(s)             | 48.7                | 4.22(s)             | 57.2                |
| 14-CH <sub>3</sub>    | 1.70(s)             | 26.0                | 1.45(s)             | 28.1                | 1.46(s)             | 28.4                |
| 15-CH <sub>3</sub>    | 1.88(s)             | 18.4                | 1.45(s)             | 28.1                | 1.46(s)             | 28.4                |
| 3'''-OCH <sub>3</sub> | -                   | -                   | -                   | -                   | 3.84(s)             | 56.2                |
| 5'''-OCH <sub>3</sub> | -                   | -                   | 3.85(s)             | 56.5                | 3.84(s)             | 56.2                |

#### 4. Data information of compounds (1-9).

3,3',4'',6,6''-tetrahydroxy-7''',8''''-(4''''-hydroxy-1''''-cinnamylalcohol)-10,10''-biauronlignan (**1**): a yellow amorphous powder, HR-ESI-MS:  $m/z$  669.1395  $[M + H]^+$  (calc. for  $C_{39}H_{25}O_{11}$ , 669.1397); UV (MeOH)  $\lambda_{max}$ : 204, 255, 335, 402 nm; IR (KBr)  $\nu_{max}$ : 3452, 1668, 1605, 1514, 1385  $cm^{-1}$ ;  $^1H$  NMR and  $^{13}C$  NMR data were shown in Table S1.

3',4'',6,6''-tetrahydroxy-7''',8''''-(4''''-hydroxy-5''''-methoxy-1''''-cinnamylalcohol)-10,10''-biauronlignan (**2**): a yellow amorphous powder, HR-ESI-MS:  $m/z$  715.1453  $[M + H]^+$  (calc. for  $C_{40}H_{27}O_{13}$ , 715.1452); UV (MeOH)  $\lambda_{max}$ : 205, 255, 335, 401 nm; IR (KBr)  $\nu_{max}$ : 3454, 1668, 1606, 1513, 1387  $cm^{-1}$ ;  $^1H$  NMR and  $^{13}C$  NMR data were shown in Table S1.

3',4'',6,6''-tetrahydroxy-4'-(4''''-hydroxy-3''''',5''''-dimethoxy-1''''-cinnamylalcohol)-10,10''-biauronlignan (**3**): a yellow amorphous powder, HR-ESI-MS:  $m/z$  747.1716  $[M + H]^+$  (calc. for  $C_{41}H_{30}O_{14}$ , 747.1714); UV (MeOH)  $\lambda_{max}$ : 207, 255, 335, 403 nm; IR (KBr)  $\nu_{max}$ : 3453, 1668, 1606, 1511, 1386  $cm^{-1}$ ;  $^1H$  NMR and  $^{13}C$  NMR data were shown in Table S1.

3',6-dihydroxy-7-prenyl-7''',8''''-(4''''-hydroxy-1''''-cinnamylalcohol)-10-(4''-hydroxy-benzyl)-auronlignan (**4**): a yellow amorphous powder, HR-ESI-MS:  $m/z$  591.2017  $[M + H]^+$  (calc. for  $C_{36}H_{31}O_8$ , 591.2019); UV (MeOH)  $\lambda_{max}$ : 203, 256, 275, 403 nm; IR (KBr)  $\nu_{max}$ : 3348, 1674, 1608, 1507, 1387  $cm^{-1}$ ;  $^1H$  NMR and  $^{13}C$  NMR data were shown in Table S2.

3'-hydroxy-6,7-(14,15-dimethyl-11-cyclohexanone)-7''',8''''-(4''''-hydroxy-5''''-

methoxy-1'''-cinnamylalcohol)-10-(4''-hydroxy-benzyl)-auronlignan (**5**): a yellow amorphous powder, HR-ESI-MS:  $m/z$  651.1863  $[M + H]^+$  (calc. for  $C_{37}H_{31}O_{11}$ , 651.1866); UV (MeOH)  $\lambda_{max}$ : 202, 255, 275, 404 nm; IR (KBr)  $\nu_{max}$ : 3346, 1674, 1607, 1508, 1388  $cm^{-1}$ ;  $^1H$  NMR and  $^{13}C$  NMR data were shown in Table S2.

3'/5'/6-trihydroxy-7-(14,15-dimethylbutan-12-one)-4'-(4'''-hydroxy-3''',5'''-methoxy-1'''-cinnamylalcohol)-10-(4''-hydroxy-benzyl)-auronlignan (**6**): a yellow amorphous powder, HR-ESI-MS:  $m/z$  685.2282  $[M + H]^+$  (calc. for  $C_{38}H_{37}O_{12}$ , 685.2285); UV (MeOH)  $\lambda_{max}$ : 204, 254, 275, 401 nm; IR (KBr)  $\nu_{max}$ : 3343, 1676, 1604, 1509, 1387  $cm^{-1}$ ;  $^1H$  NMR and  $^{13}C$  NMR data were shown in Table S2.

3',6-dihydroxy-7-prenyl-7''',8'''-(4'''-hydroxy-1'''-cinnamylalcohol)-10-O- $\beta$ -D-glucopyranosyl-auronlignan (**7**): a yellow amorphous powder, HR-ESI-MS:  $m/z$  663.2079  $[M + H]^+$  (calc. for  $C_{35}H_{35}O_{13}$ , 663.2078); UV (MeOH)  $\lambda_{max}$ : 203, 255, 275, 402 nm; IR (KBr)  $\nu_{max}$ : 3346, 1675, 1610, 1511, 1388  $cm^{-1}$ ;  $^1H$  NMR and  $^{13}C$  NMR data were shown in Table S3.

3'-hydroxy-6,7-(14,15-dimethylchromeneprenyl)-7''',8'''-(4'''-hydroxy-5''''-methoxy-1'''-cinnamylalcohol)-10-O- $\beta$ -D-glucopyranosyl-auronlignan (**8**): a yellow amorphous powder, HR-ESI-MS:  $m/z$  707.1973  $[M + H]^+$  (calc. for  $C_{36}H_{35}O_{15}$ , 707.1976); UV (MeOH)  $\lambda_{max}$ : 202, 255, 275, 403 nm; IR (KBr)  $\nu_{max}$ : 3348, 1674, 1608, 1506, 1389  $cm^{-1}$ ;  $^1H$  NMR and  $^{13}C$  NMR data were shown in Table S3.

3',5',6-trihydroxy-7-isopentenol-7''',8'''-(4'''-hydroxy-3''',5'''-methoxy-1'''-cinnamyl alcohol)-10-O- $\beta$ -D-glucopyranosyl-auronlignan (**9**): a yellow amorphous powder, HR-ESI-MS:  $m/z$  757.2348  $[M + H]^+$  (calc. for  $C_{37}H_{41}O_{17}$ , 757.2344); UV (MeOH)  $\lambda_{max}$ : 205, 254, 275, 402 nm; IR (KBr)  $\nu_{max}$ : 3345, 1677, 1607, 1510, 1386  $cm^{-1}$ ;  $^1H$  NMR and  $^{13}C$  NMR data were shown in Table S3.
